# Supplementary material
Source: publisher site journal article supplement (https://www.dovepress.com/article/583185)
Supplement: Supplementary file 1 [file 583185%20Supplementary%20Material.docx]

**
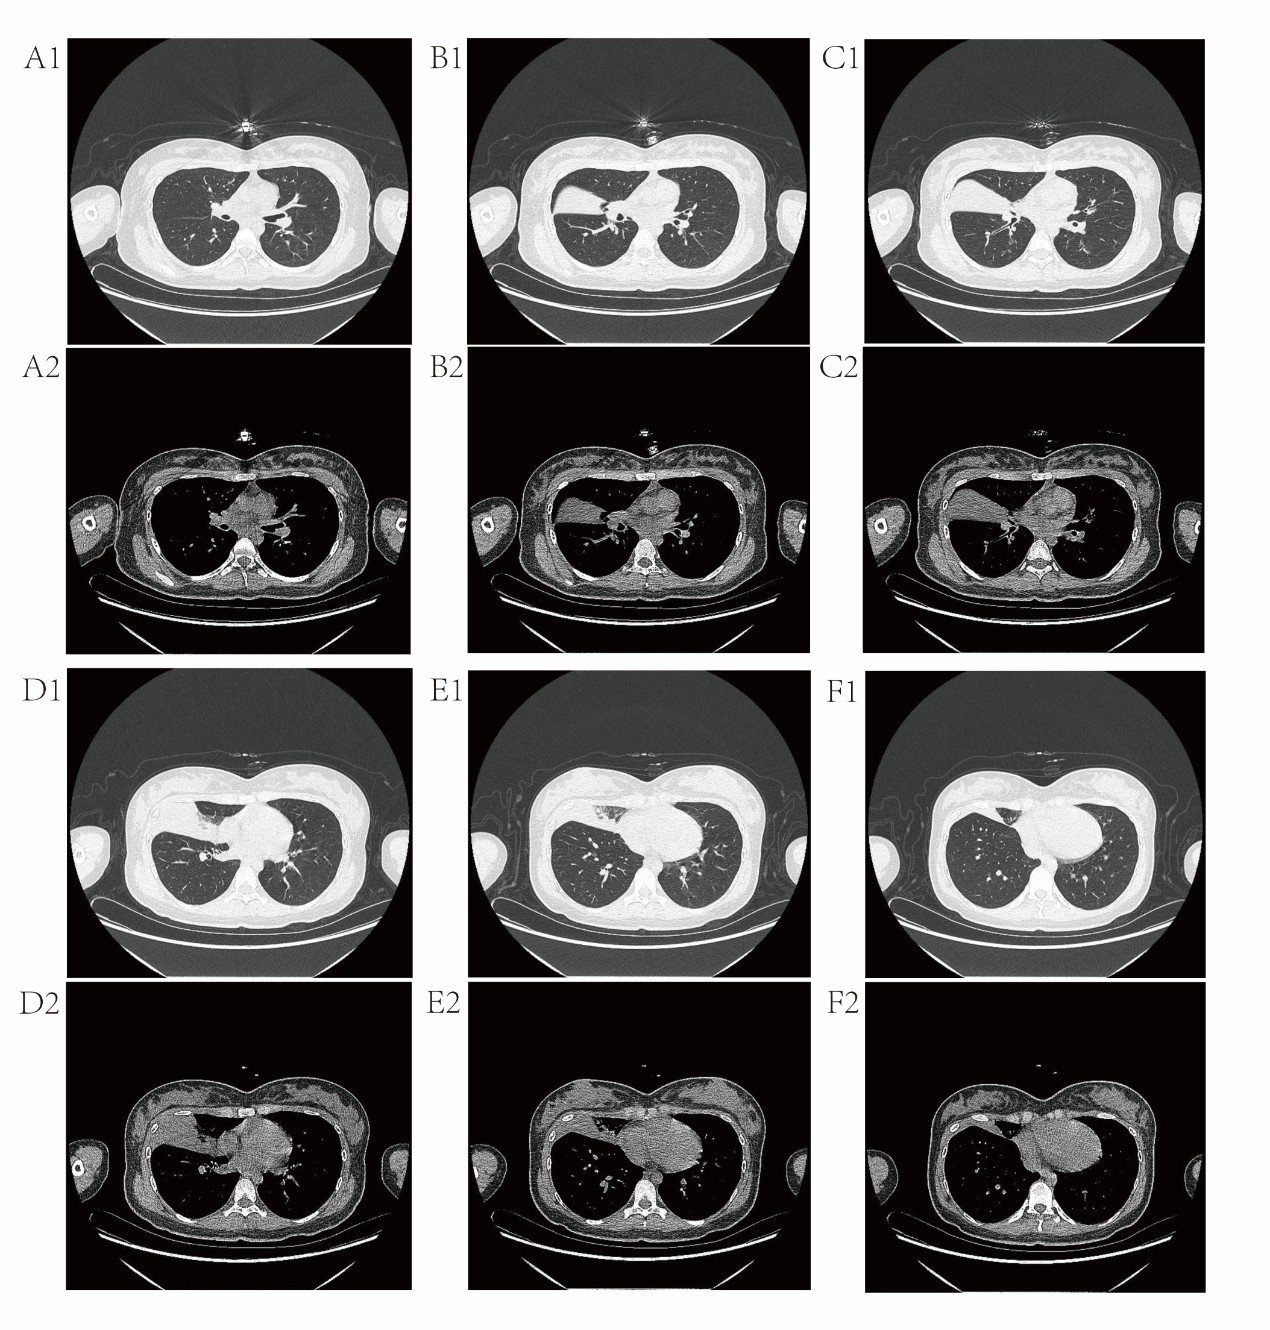
**

Figure 1S. Chest computed tomography (CT) images. The images are organized into 12 panels (A1–F2), each showing slices at different levels of the thorax. The panels from A1 to F1 are lung window images. The panels from A2 to F2 are mediastinal window images. Prominent consolidation was localized primarily to the right middle lobe. No evidence of other abnormal images such as pleural effusion or lymphadenopathy noted was observed, suggesting an uncomplicated course of pneumonia.


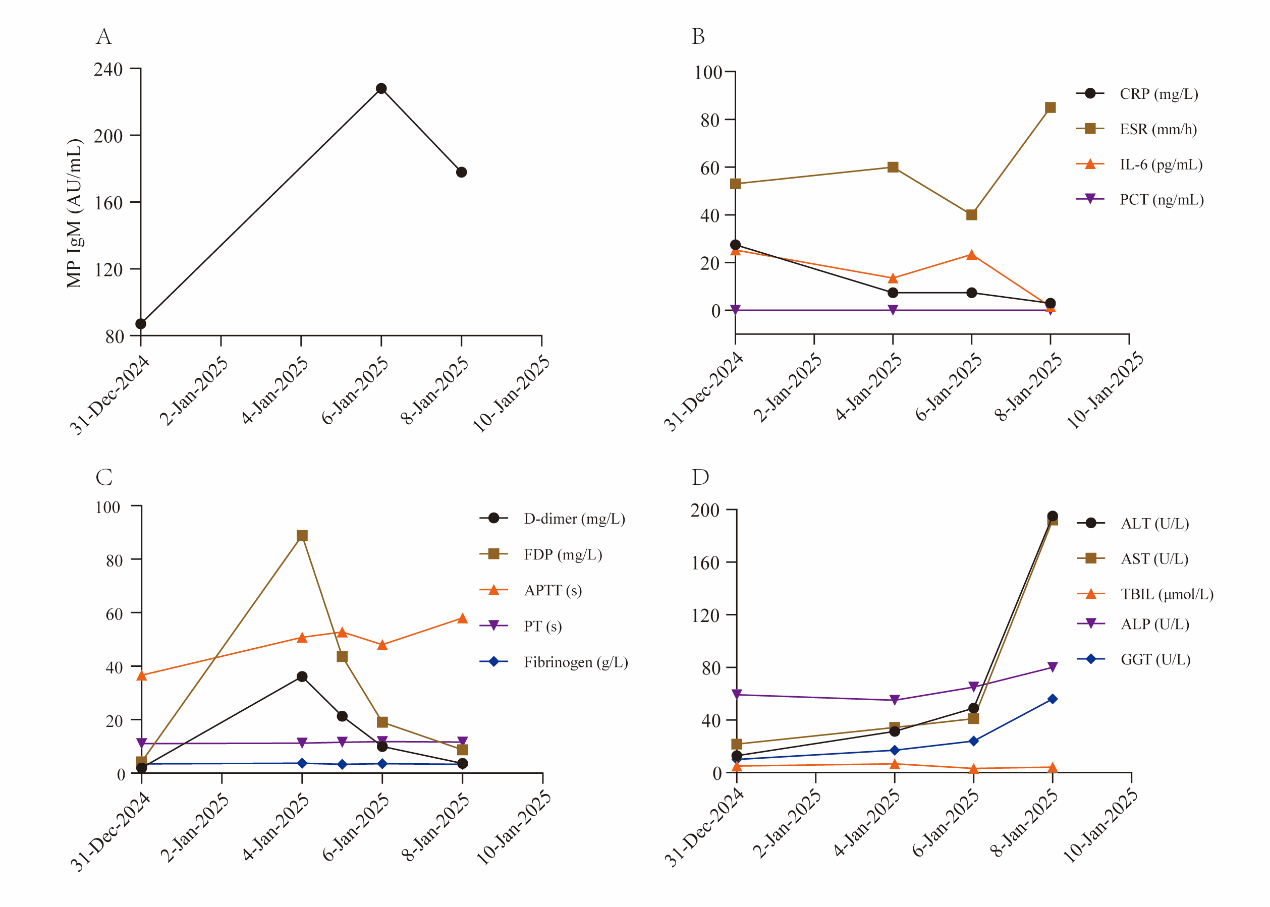


Figure 2S. Blood test value over time. Figure 2S-A, *Mycoplasma pneumoniae* IgM antibody titers over time. Figure 2S-B, inflammatory markers over time. Figure 2S-C, coagulation parameters over time. Figure 2S-D, liver function tests over time.

Table 1S. Drug administration timeline with clinical events

| Date | Drug Administered | Event / Adverse Reaction |
| --- | --- | --- |
| 2024/12/31 | Omadacycline | Start of treatment |
| 2025/1/2 | Rash on infusion arm |
| 2025/1/3 | Nausea, vomiting, diarrhea, syncope |
| 2025/1/4 | Generalized pruritic rash |
| 2025/1/5 | Ceftriaxone + Azithromycin | Switched to alternative therapy |
| Recurrent rash after administration |
| Enoxaparin | Initiated anticoagulant therapy |
| 2025/1/6-2025/1/9 |
| Levofloxacin | Final antibiotic switch |
| Hepatoprotective agents | Initiated due to elevated liver enzymes |
